# Supplementary material for: Integrative analysis of DNA methylation and gene expression identifies genes associated with biological aging in Alzheimer's disease
Source: PubMed Central journal article supplement — Alzheimers Dement (Amst). 2022 Sep 20;14(1):e12354. doi: 10.1002/dad2.12354 (PMC9489162; doi:10.1002/dad2.12354), 2022-09-20
Supplement: DAD2-14-e12354-s001.pdf [file DAD2-14-e12354-s001.pdf]

**Integrative analysis of DNA methylation and gene expression identifies genes associated  
with biological aging in Alzheimer's disease**

Bo-Hyun Kim<sup>1,2,11</sup>, Aparna Vasanthakumar<sup>3</sup>, Qingqin S Li<sup>4</sup>, Kelly N.H. Nudelman<sup>5,6,7</sup>, Shannon  
L Risacher<sup>1,6</sup>, Justin W. Davis<sup>3</sup>, Kenneth Idler<sup>3</sup>, Jong-Min Lee<sup>9</sup>, Sang Won Seo<sup>2,10,11</sup>, Jeffrey F.  
Waring<sup>3</sup>, Andrew J. Saykin<sup>1,6,7\*</sup>, and Kwangsik Nho<sup>1,6,8\*</sup>, for the Alzheimer's Disease  
Neuroimaging Initiative (ADNI)<sup>§</sup>

## Supplementary Data

**Supplementary Table 1. The number of probes and genes in modules.**

|               | Number of probes | Number of genes |
|---------------|------------------|-----------------|
| MEblack       | 238              | 196             |
| MEblue        | 2997             | 1932            |
| MEbrown       | 2596             | 1818            |
| MEcyan        | 91               | 66              |
| MEdarkred     | 33               | 23              |
| MEgreen       | 336              | 290             |
| MEgreenyellow | 149              | 98              |
| MEgrey60      | 64               | 58              |
| MElightcyan   | 70               | 46              |
| MElightgreen  | 62               | 40              |
| MElightyellow | 43               | 26              |
| EMagenta      | 234              | 181             |
| EMidnightblue | 86               | 59              |
| MEpink        | 235              | 156             |
| MEpurple      | 206              | 142             |
| MEred         | 309              | 260             |
| MEroyalblue   | 37               | 32              |
| MEsalmon      | 113              | 70              |
| MEtan         | 118              | 81              |
| MEturquoise   | 4678             | 3110            |
| MEyellow      | 607              | 342             |
| MEgrey        | 7848             | 5125            |

Abbreviations: ME, module eigenvalue.

**Supplementary Table 2. Relationship between modules and biological clocks in the CN group.**

|                | TL     |          | DNAmTL |          | DNAmGrimAge |          | DNAmAgeSkinBlood |          |
|----------------|--------|----------|--------|----------|-------------|----------|------------------|----------|
|                | r      | P        | r      | P        | r           | P        | r                | P        |
| MEblack        | 0.091  | 2.18E-01 | 0.060  | 4.19E-01 | 0.047       | 5.27E-01 | -0.004           | 9.58E-01 |
| MEblue         | 0.123  | 9.52E-02 | 0.029  | 6.99E-01 | 0.128       | 8.09E-02 | -0.142           | 5.37E-02 |
| MEbrown        | 0.036  | 6.26E-01 | -0.125 | 8.91E-02 | -0.032      | 6.67E-01 | 0.034            | 6.44E-01 |
| MEcyan         | 0.084  | 2.56E-01 | -0.128 | 8.10E-02 | -0.036      | 6.24E-01 | 0.030            | 6.87E-01 |
| MEdarkred      | -0.131 | 7.38E-02 | -0.111 | 1.30E-01 | 0.045       | 5.38E-01 | 0.064            | 3.85E-01 |
| MEgreen        | -0.075 | 3.12E-01 | 0.085  | 2.50E-01 | -0.014      | 8.54E-01 | 0.060            | 4.17E-01 |
| MEgreenyellow  | 0.015  | 8.42E-01 | -0.073 | 3.22E-01 | 0.057       | 4.37E-01 | 0.077            | 2.98E-01 |
| MEgrey60       | 0.057  | 4.37E-01 | -0.017 | 8.19E-01 | 0.002       | 9.75E-01 | -0.041           | 5.81E-01 |
| MElightcyan    | 0.094  | 2.03E-01 | -0.103 | 1.61E-01 | 0.076       | 3.03E-01 | -0.048           | 5.15E-01 |
| MElightgreen   | -0.052 | 4.78E-01 | -0.165 | 2.40E-02 | 0.121       | 1.00E-01 | -0.002           | 9.84E-01 |
| MElightyellow  | 0.021  | 7.72E-01 | -0.061 | 4.10E-01 | 0.099       | 1.81E-01 | -0.042           | 5.69E-01 |
| MEmagenta      | 0.088  | 2.32E-01 | 0.121  | 1.00E-01 | 0.037       | 6.17E-01 | 0.002            | 9.78E-01 |
| MEmidnightblue | -0.044 | 5.55E-01 | 0.060  | 4.18E-01 | -0.147      | 4.50E-02 | 0.082            | 2.68E-01 |
| MEpink         | 0.011  | 8.78E-01 | 0.037  | 6.13E-01 | -0.134      | 6.86E-02 | 0.073            | 3.19E-01 |
| MEpurple       | -0.160 | 2.88E-02 | -0.210 | 4.00E-03 | -0.067      | 3.61E-01 | 0.111            | 1.31E-01 |
| MERed          | 0.022  | 7.64E-01 | 0.111  | 1.30E-01 | 0.018       | 8.08E-01 | -0.034           | 6.50E-01 |
| MEroyalblue    | 0.142  | 5.32E-02 | 0.115  | 1.19E-01 | 0.123       | 9.43E-02 | -0.020           | 7.85E-01 |
| MEsalmon       | -0.084 | 2.56E-01 | -0.096 | 1.95E-01 | 0.117       | 1.12E-01 | 0.007            | 9.30E-01 |
| MEtan          | -0.164 | 2.56E-02 | -0.016 | 8.31E-01 | -0.067      | 3.64E-01 | 0.052            | 4.82E-01 |
| MEturquoise    | -0.070 | 3.40E-01 | 0.077  | 2.96E-01 | -0.065      | 3.78E-01 | 0.038            | 6.05E-01 |
| MEyellow       | -0.018 | 8.11E-01 | -0.102 | 1.65E-01 | 0.108       | 1.43E-01 | 0.100            | 1.76E-01 |

**Supplementary Table 3. Relationship between modules and biological clocks in the MCI group.**

|                | TL     |          | DNAmTL |          | DNAmGrimAge |          | DNAmAgeSkinBlood |          |
|----------------|--------|----------|--------|----------|-------------|----------|------------------|----------|
|                | r      | P        | r      | P        | r           | P        | r                | P        |
| Grep MEblack   | 0.022  | 7.23E-01 | -0.025 | 6.77E-01 | 0.037       | 5.45E-01 | -0.130           | 3.17E-02 |
| MEblue         | 0.137  | 2.39E-02 | 0.093  | 1.25E-01 | 0.034       | 5.80E-01 | -0.207           | 5.81E-04 |
| MEbrown        | -0.082 | 1.78E-01 | -0.076 | 2.11E-01 | -0.198      | 1.01E-03 | 0.164            | 6.88E-03 |
| MEcyan         | 0.062  | 3.08E-01 | -0.058 | 3.40E-01 | 0.027       | 6.54E-01 | -0.039           | 5.18E-01 |
| MEdarkred      | 0.001  | 9.82E-01 | 0.025  | 6.83E-01 | 0.165       | 6.49E-03 | -0.080           | 1.90E-01 |
| MEgreen        | -0.007 | 9.03E-01 | 0.033  | 5.90E-01 | 0.000       | 9.98E-01 | 0.048            | 4.27E-01 |
| MEgreenyellow  | 0.018  | 7.73E-01 | 0.006  | 9.19E-01 | 0.015       | 8.01E-01 | -0.153           | 1.16E-02 |
| MEgrey60       | -0.018 | 7.66E-01 | -0.083 | 1.74E-01 | -0.024      | 6.92E-01 | 0.014            | 8.17E-01 |
| MElightcyan    | 0.023  | 7.07E-01 | 0.069  | 2.57E-01 | -0.060      | 3.26E-01 | -0.047           | 4.38E-01 |
| MElightgreen   | 0.011  | 8.53E-01 | 0.021  | 7.26E-01 | 0.096       | 1.13E-01 | -0.103           | 9.13E-02 |
| MElightyellow  | -0.020 | 7.44E-01 | -0.010 | 8.66E-01 | -0.034      | 5.71E-01 | 0.016            | 7.88E-01 |
| MEmagenta      | 0.087  | 1.52E-01 | 0.029  | 6.29E-01 | 0.083       | 1.75E-01 | -0.121           | 4.66E-02 |
| MEmidnightblue | -0.063 | 3.01E-01 | 0.020  | 7.39E-01 | -0.116      | 5.63E-02 | 0.082            | 1.77E-01 |
| MEpink         | -0.093 | 1.24E-01 | -0.014 | 8.15E-01 | -0.054      | 3.73E-01 | 0.179            | 3.14E-03 |
| MEpurple       | -0.214 | 3.78E-04 | -0.272 | 5.53E-06 | -0.110      | 7.05E-02 | 0.266            | 8.93E-06 |
| MERed          | 0.087  | 1.54E-01 | 0.063  | 3.04E-01 | 0.081       | 1.81E-01 | -0.042           | 4.91E-01 |
| MEroyalblue    | 0.107  | 7.84E-02 | 0.115  | 5.73E-02 | -0.011      | 8.57E-01 | -0.095           | 1.17E-01 |
| MEsalmon       | 0.027  | 6.63E-01 | 0.098  | 1.06E-01 | 0.036       | 5.54E-01 | -0.158           | 9.25E-03 |
| MEtan          | -0.125 | 3.98E-02 | 0.078  | 1.97E-01 | -0.011      | 8.53E-01 | 0.096            | 1.13E-01 |
| MEturquoise    | -0.029 | 6.34E-01 | 0.012  | 8.39E-01 | 0.099       | 1.02E-01 | 0.036            | 5.52E-01 |
| MEyellow       | -0.010 | 8.74E-01 | -0.023 | 7.00E-01 | 0.008       | 8.93E-01 | 0.016            | 7.94E-01 |

**Supplementary Table 4. Relationship between modules and biological clocks in the AD group.**

|                | TL     |          | DNAmTL |          | DNAmGrimAge |          | DNAmAgeSkinBlood |          |
|----------------|--------|----------|--------|----------|-------------|----------|------------------|----------|
|                | r      | P        | r      | P        | r           | P        | r                | P        |
| MEblack        | 0.111  | 2.90E-01 | 0.113  | 2.79E-01 | -0.117      | 2.66E-01 | -0.203           | 5.09E-02 |
| MEblue         | 0.074  | 4.84E-01 | 0.159  | 1.28E-01 | 0.092       | 3.79E-01 | -0.174           | 9.57E-02 |
| MEbrown        | -0.107 | 3.07E-01 | -0.115 | 2.72E-01 | -0.073      | 4.84E-01 | 0.191            | 6.72E-02 |
| MEcyan         | 0.025  | 8.14E-01 | -0.118 | 2.58E-01 | 0.208       | 4.49E-02 | 0.224            | 3.10E-02 |
| MEdarkred      | -0.154 | 1.42E-01 | -0.041 | 6.96E-01 | 0.002       | 9.88E-01 | 0.066            | 5.31E-01 |
| MEgreen        | -0.006 | 9.56E-01 | 0.002  | 9.84E-01 | -0.022      | 8.35E-01 | -0.161           | 1.24E-01 |
| MEgreenyellow  | 0.040  | 7.02E-01 | 0.200  | 5.45E-02 | -0.058      | 5.83E-01 | -0.097           | 3.54E-01 |
| MEgrey60       | 0.123  | 2.40E-01 | -0.018 | 8.65E-01 | 0.086       | 4.12E-01 | 0.136            | 1.95E-01 |
| MElightcyan    | -0.108 | 3.02E-01 | 0.037  | 7.28E-01 | 0.000       | 9.97E-01 | -0.024           | 8.18E-01 |
| MElightgreen   | -0.157 | 1.34E-01 | -0.033 | 7.54E-01 | 0.058       | 5.82E-01 | 0.045            | 6.70E-01 |
| MElightyellow  | -0.119 | 2.58E-01 | 0.050  | 6.36E-01 | -0.022      | 8.36E-01 | 0.060            | 5.71E-01 |
| MEmagenta      | 0.102  | 3.31E-01 | 0.146  | 1.64E-01 | -0.055      | 5.97E-01 | -0.329           | 1.30E-03 |
| MEmidnightblue | -0.004 | 9.72E-01 | 0.076  | 4.67E-01 | -0.052      | 6.18E-01 | 0.022            | 8.37E-01 |
| MEpink         | -0.068 | 5.16E-01 | -0.178 | 8.77E-02 | -0.061      | 5.62E-01 | 0.187            | 7.33E-02 |
| MEpurple       | -0.159 | 1.27E-01 | -0.079 | 4.50E-01 | -0.112      | 2.84E-01 | 0.180            | 8.40E-02 |
| MERed          | 0.007  | 9.46E-01 | 0.086  | 4.13E-01 | -0.016      | 8.79E-01 | -0.258           | 1.25E-02 |
| MEroyalblue    | -0.131 | 2.11E-01 | -0.108 | 3.02E-01 | 0.146       | 1.62E-01 | -0.200           | 5.46E-02 |
| MEsalmon       | -0.080 | 4.47E-01 | -0.128 | 2.21E-01 | 0.019       | 8.56E-01 | 0.084            | 4.24E-01 |
| MEtan          | -0.115 | 2.74E-01 | -0.237 | 2.24E-02 | -0.049      | 6.40E-01 | 0.139            | 1.83E-01 |
| MEturquoise    | -0.004 | 9.71E-01 | -0.023 | 8.26E-01 | -0.023      | 8.27E-01 | -0.032           | 7.62E-01 |
| MEyellow       | 0.004  | 9.69E-01 | 0.034  | 7.49E-01 | 0.057       | 5.87E-01 | 0.043            | 6.82E-01 |

**Supplementary Table 5. Hub genes in the purple module and their corresponding MCC scores.**

| Rank | Gene Symbol   | Gene Name                           | MCC score |
|------|---------------|-------------------------------------|-----------|
| 1    | <i>CCR5</i>   | C-C motif chemokine receptor 5      | 746       |
| 1    | <i>CCL4</i>   | C-C motif chemokine ligand 4        | 746       |
| 3    | <i>CXCR6</i>  | C-X-C motif chemokine receptor 6    | 745       |
| 4    | <i>CX3CR1</i> | C-X3-C motif chemokine receptor 1   | 744       |
| 5    | <i>NMUR1</i>  | neuromedin U receptor 1             | 722       |
| 6    | <i>SIPR5</i>  | sphingosine-1-phosphate receptor 5  | 720       |
| 6    | <i>CCL5</i>   | C-C motif chemokine ligand 5        | 720       |
| 8    | <i>PRF1</i>   | perforin 1                          | 60        |
| 9    | <i>IL2RB</i>  | interleukin 2 receptor subunit beta | 58        |
| 10   | <i>GZMB</i>   | granzyme B                          | 52        |

Abbreviations: MCC score, maximal clique centrality.

**Supplementary Table 6. Gene-set enrichment analysis of the blue module for biological clocks.**

| Biological age   | Gene Ontology                               | N genes | NES    | FDR P                 |
|------------------|---------------------------------------------|---------|--------|-----------------------|
| TL               | Kinetochore                                 | 18      | -1.375 | $2.62 \times 10^{-2}$ |
|                  | Endosome                                    | 149     | -1.322 | $3.88 \times 10^{-2}$ |
|                  | Preribosome                                 | 10      | 1.503  | $1.20 \times 10^{-2}$ |
|                  | Ribosome                                    | 25      | 1.491  | $6.01 \times 10^{-3}$ |
|                  | Transferase complex                         | 109     | 1.465  | $5.34 \times 10^{-3}$ |
|                  | Mitochondrial matrix                        | 65      | 1.387  | $1.53 \times 10^{-2}$ |
|                  | Intracellular protein containing complex    | 124     | 1.370  | $1.55 \times 10^{-2}$ |
|                  | Condensed nuclear chromosome                | 7       | 1.349  | $1.81 \times 10^{-2}$ |
|                  | Large ribosomal subunit                     | 11      | 1.333  | $1.85 \times 10^{-2}$ |
|                  | Intrinsic component of organelle membrane   | 48      | 1.295  | $3.31 \times 10^{-2}$ |
|                  | Ubiquitin ligase complex                    | 42      | 1.289  | $3.22 \times 10^{-2}$ |
|                  | Mitochondrion                               | 210     | 1.282  | $3.29 \times 10^{-2}$ |
|                  | Kinesin complex                             | 7       | 1.272  | $3.60 \times 10^{-2}$ |
|                  | Amide biosynthetic process                  | 102     | 1.515  | $1.60 \times 10^{-2}$ |
| DNAmAgeSkinBlood | Myeloid leukocyte mediated immunity         | 143     | 2.471  | $1.94 \times 10^{-2}$ |
|                  | Leukocyte mediated immunity                 | 172     | 2.456  | $9.69 \times 10^{-3}$ |
|                  | Cell activation involved in immune response | 168     | 2.414  | $9.78 \times 10^{-3}$ |
|                  | Exocytosis                                  | 186     | 2.395  | $8.18 \times 10^{-3}$ |
|                  | Cell activation                             | 243     | 2.382  | $7.24 \times 10^{-3}$ |
|                  | Myeloid leukocyte activation                | 159     | 2.376  | $6.37 \times 10^{-3}$ |
|                  | Immune effector process                     | 225     | 2.375  | $5.46 \times 10^{-3}$ |
|                  | Secretion                                   | 238     | 2.340  | $5.92 \times 10^{-3}$ |
|                  | Locomotion                                  | 188     | 2.142  | $3.70 \times 10^{-2}$ |
|                  | Secretory vesicle                           | 177     | 2.299  | $4.06 \times 10^{-3}$ |
|                  | Secretory granule membrane                  | 72      | 2.189  | $1.08 \times 10^{-2}$ |
|                  | Endosome                                    | 149     | 2.066  | $2.79 \times 10^{-2}$ |

Abbreviations: N genes, the number of genes in gene sets; NES, normalized enrichment score; FDR P, FDR corrected p value.

**Supplementary Table 7. Gene-set enrichment analysis of the brown module for biological clocks.**

| Biological age   | Gene Ontology                                                                 | N genes | NES    | FDR P                 |
|------------------|-------------------------------------------------------------------------------|---------|--------|-----------------------|
| DNAmGrimAge      | Somatic recombination of immunoglobulin gene segments                         | 12      | -2.592 | $2.48 \times 10^{-2}$ |
|                  | Immunoglobulin production involved in immunoglobulin mediated immune response | 10      | -2.512 | $2.99 \times 10^{-2}$ |
| DNAmAgeSkinBlood | Endosome                                                                      | 99      | 2.476  | $2.08 \times 10^{-3}$ |
|                  | Early endosome                                                                | 38      | 2.223  | $2.24 \times 10^{-2}$ |
|                  | Endosome membrane                                                             | 58      | 2.161  | $2.67 \times 10^{-2}$ |



**Supplementary Table 8. Differentially expressed probes and related hub genes in the blue module.**

| probe ID      | Gene   | CN      | MCI     | AD      | P                       | FDR P                   |
|---------------|--------|---------|---------|---------|-------------------------|-------------------------|
| 11757102_a_at | BOP1   | -0.0144 | 0.0134  | -0.0104 | 5.43 x 10 <sup>-1</sup> | 7.69 x 10 <sup>-1</sup> |
| 11717511_a_at | CIRH1A | 0.0174  | -0.0017 | -0.0298 | 3.12 x 10 <sup>-1</sup> | 5.30 x 10 <sup>-1</sup> |
| 11716449_a_at | DDX56  | -0.0028 | 0.0013  | 0.0018  | 9.83 x 10 <sup>-1</sup> | 9.83 x 10 <sup>-1</sup> |
| 11750693_a_at | FTSJ3  | 0.0076  | -0.0139 | 0.0254  | 4.78 x 10 <sup>-1</sup> | 7.39 x 10 <sup>-1</sup> |
| 11719034_a_at | FTSJ3  | -0.0065 | -0.0033 | 0.0226  | 6.47 x 10 <sup>-1</sup> | 8.46 x 10 <sup>-1</sup> |
| 11719474_a_at | IMP4   | -0.0071 | 0.0059  | -0.0030 | 8.68 x 10 <sup>-1</sup> | 9.22 x 10 <sup>-1</sup> |
| 11741201_a_at | NAT10  | 0.0087  | 0.0133  | -0.0562 | 1.33 x 10 <sup>-1</sup> | 4.84 x 10 <sup>-1</sup> |
| 11716123_a_at | NAT10  | 0.0040  | 0.0143  | -0.0499 | 2.78 x 10 <sup>-1</sup> | 5.25 x 10 <sup>-1</sup> |
| 11716124_a_at | NAT10  | 0.0237  | 0.0048  | -0.0615 | 6.63 x 10 <sup>-2</sup> | 4.84 x 10 <sup>-1</sup> |
| 11757561_s_at | NOC2L  | -0.0036 | 0.0072  | -0.0138 | 7.82 x 10 <sup>-1</sup> | 8.87 x 10 <sup>-1</sup> |
| 11747090_a_at | NOP58  | 0.0273  | -0.0032 | -0.0452 | 2.28 x 10 <sup>-1</sup> | 4.84 x 10 <sup>-1</sup> |
| 11744098_at   | NOP58  | 0.0186  | 0.0026  | -0.0447 | 1.88 x 10 <sup>-1</sup> | 4.84 x 10 <sup>-1</sup> |
| 11716242_a_at | PES1   | -0.0089 | 0.0181  | -0.0352 | 1.94 x 10 <sup>-1</sup> | 4.84 x 10 <sup>-1</sup> |
| 11739313_a_at | PWP1   | 0.0019  | 0.0062  | -0.0218 | 7.37 x 10 <sup>-1</sup> | 8.87 x 10 <sup>-1</sup> |
| 11763276_a_at | PWP1   | 0.0482  | -0.0218 | -0.0324 | 2.24 x 10 <sup>-1</sup> | 4.84 x 10 <sup>-1</sup> |
| 11757899_x_at | PWP1   | -0.0012 | 0.0176  | -0.0491 | 2.01 x 10 <sup>-1</sup> | 4.84 x 10 <sup>-1</sup> |
| 11754220_a_at | PWP1   | 0.0229  | 0.0039  | -0.0572 | 4.34 x 10 <sup>-2</sup> | 4.84 x 10 <sup>-1</sup> |

Note: Boldface indicates FDR- P values less than 0.05. Abbreviations: CN, cognitively normal old adults; MCI, mild cognitive impairment; AD, Alzheimer's disease; P, p value; FDR P, FDR corrected p value.

**Supplementary Table 9. Differentially expressed probes and related hub genes in the brown module.**

| probe ID      | Gene     | CN      | MCI     | AD      | P                       | FDR P                   |
|---------------|----------|---------|---------|---------|-------------------------|-------------------------|
| 11760685_x_at | BRIX1    | 0.0068  | 0.0004  | -0.0148 | 8.06 x 10 <sup>-1</sup> | 9.41 x 10 <sup>-1</sup> |
| 11746964_a_at | BRIX1    | -0.0123 | 0.0134  | -0.0146 | 5.75 x 10 <sup>-1</sup> | 8.05 x 10 <sup>-1</sup> |
| 11720330_at   | BRIX1    | 0.0037  | 0.0003  | -0.0084 | 9.43 x 10 <sup>-1</sup> | 9.43 x 10 <sup>-1</sup> |
| 11749333_a_at | GNL3     | 0.0226  | -0.0063 | -0.0269 | 3.89 x 10 <sup>-1</sup> | 6.28 x 10 <sup>-1</sup> |
| 11717310_a_at | GNL3     | 0.0140  | -0.0057 | -0.0113 | 7.74 x 10 <sup>-1</sup> | 9.41 x 10 <sup>-1</sup> |
| 11748749_a_at | GTPBP4   | -0.0099 | -0.0004 | 0.0208  | 6.95 x 10 <sup>-1</sup> | 9.12 x 10 <sup>-1</sup> |
| 11739062_s_at | GTPBP4   | 0.0249  | -0.0066 | -0.0304 | 1.69 x 10 <sup>-1</sup> | 5.44 x 10 <sup>-1</sup> |
| 11744890_a_at | GTPBP4   | 0.0056  | -0.0021 | -0.0049 | 9.18 x 10 <sup>-1</sup> | 9.43 x 10 <sup>-1</sup> |
| 11719725_at   | KIAA0020 | 0.0334  | -0.0108 | -0.0352 | 5.02 x 10 <sup>-2</sup> | 5.44 x 10 <sup>-1</sup> |
| 11725392_a_at | MAK16    | 0.0106  | -0.0079 | 0.0020  | 8.71 x 10 <sup>-1</sup> | 9.43 x 10 <sup>-1</sup> |
| 11725393_s_at | MAK16    | 0.0355  | -0.0092 | -0.0441 | 1.49 x 10 <sup>-1</sup> | 5.44 x 10 <sup>-1</sup> |
| 11729171_x_at | NIFK     | 0.0202  | -0.0007 | -0.0383 | 2.85 x 10 <sup>-1</sup> | 5.44 x 10 <sup>-1</sup> |
| 11729172_s_at | NIFK     | 0.0246  | -0.0155 | -0.0041 | 2.19 x 10 <sup>-1</sup> | 5.44 x 10 <sup>-1</sup> |
| 11747090_a_at | NOP58    | 0.0273  | -0.0032 | -0.0452 | 2.28 x 10 <sup>-1</sup> | 5.44 x 10 <sup>-1</sup> |
| 11744098_at   | NOP58    | 0.0186  | 0.0026  | -0.0447 | 1.88 x 10 <sup>-1</sup> | 5.44 x 10 <sup>-1</sup> |
| 11741607_a_at | RRP12    | -0.0168 | -0.0069 | 0.0538  | 3.42 x 10 <sup>-1</sup> | 5.99 x 10 <sup>-1</sup> |
| 11741608_x_at | RRP12    | -0.0337 | 0.0016  | 0.0627  | 1.59 x 10 <sup>-1</sup> | 5.44 x 10 <sup>-1</sup> |
| 11754793_a_at | RRP12    | -0.0329 | 0.0008  | 0.0635  | 2.72 x 10 <sup>-1</sup> | 5.44 x 10 <sup>-1</sup> |
| 11733910_at   | UTP15    | 0.0341  | 0.0019  | -0.0739 | 2.43 x 10 <sup>-1</sup> | 5.44 x 10 <sup>-1</sup> |
| 11733911_a_at | UTP15    | 0.0420  | -0.0090 | -0.0578 | 2.48 x 10 <sup>-1</sup> | 5.44 x 10 <sup>-1</sup> |
| 11716868_at   | UTP18    | 0.0017  | 0.0086  | -0.0286 | 4.80 x 10 <sup>-1</sup> | 7.20 x 10 <sup>-1</sup> |

Note: Boldface indicates FDR- P values less than 0.05. Abbreviations: CN, cognitively normal old adults; MCI, mild cognitive impairment; AD, Alzheimer's disease; P, p value; FDR P, FDR corrected p value.

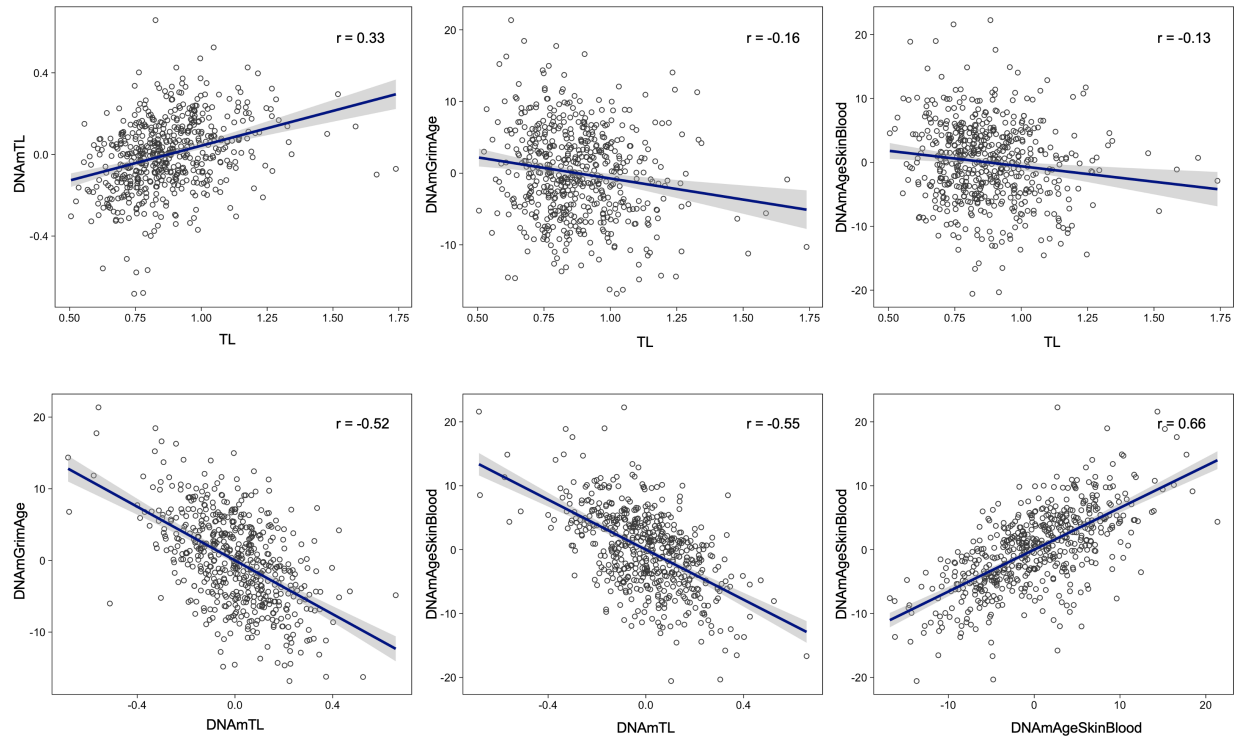

**Supplementary Fig.1 Correlation between biological clocks.** Telomere length (TL) was adjusted for experimental variables to correct for batch effects and others were adjusted for blood cell composition.

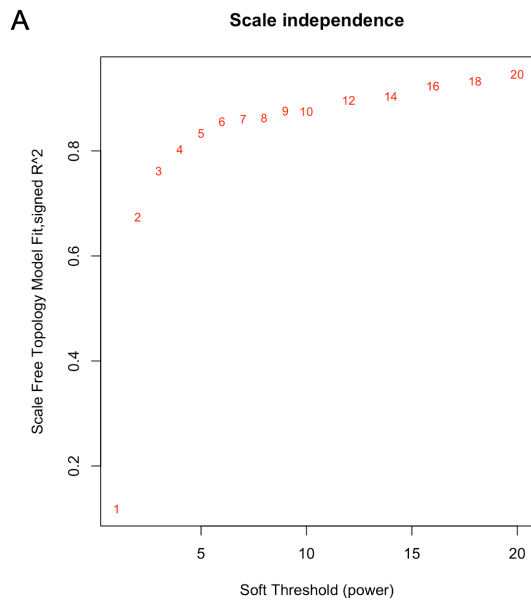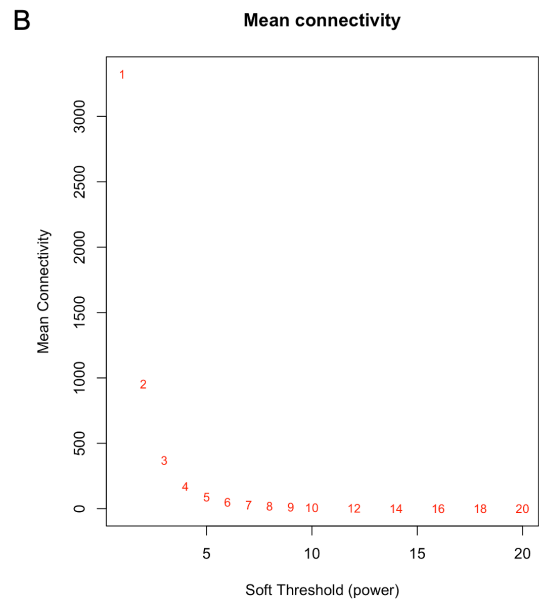

**Supplementary Fig. 2 Soft-threshold power in the weighted co-expression network.**

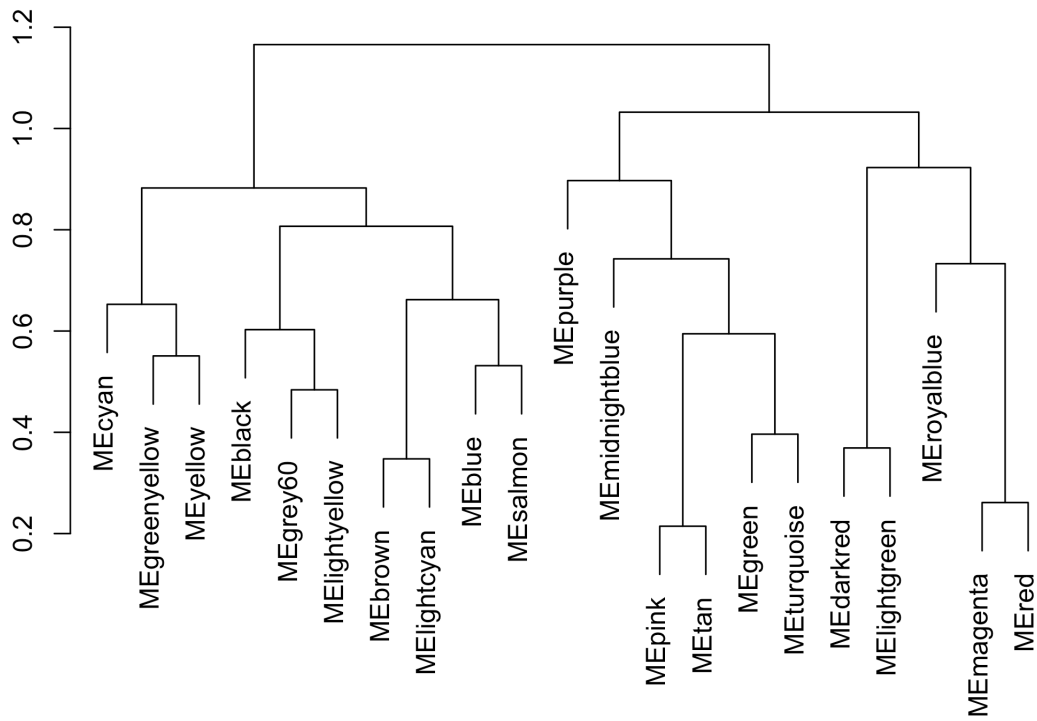

**Supplementary Fig.3 Moule relationships.** Hierarchical clustering dendrogram of module eigengenes. Branches of the dendrogram group together eigengenes that are positively correlated.

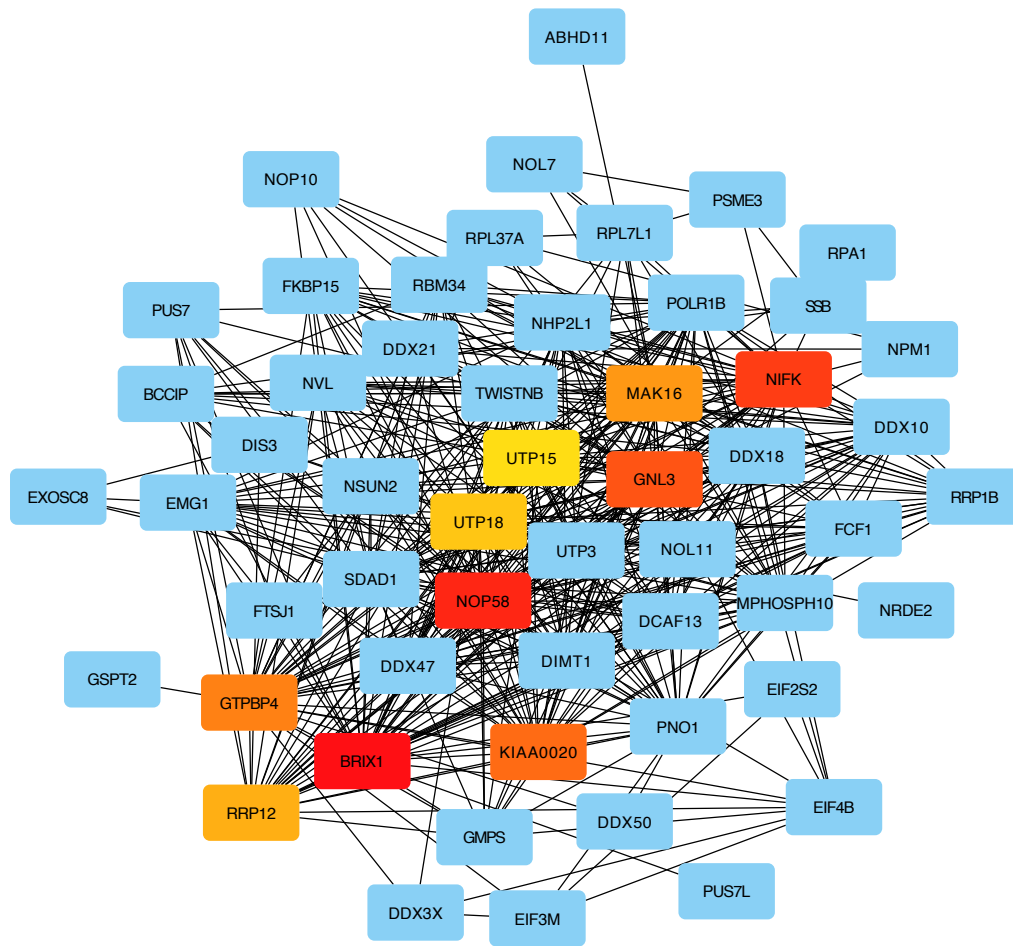

**Supplementary Fig. 4 Visualization of 10 hub genes and their first connected genes in the blue module.** The MCC scores are displayed in colors from red to yellow on the node.



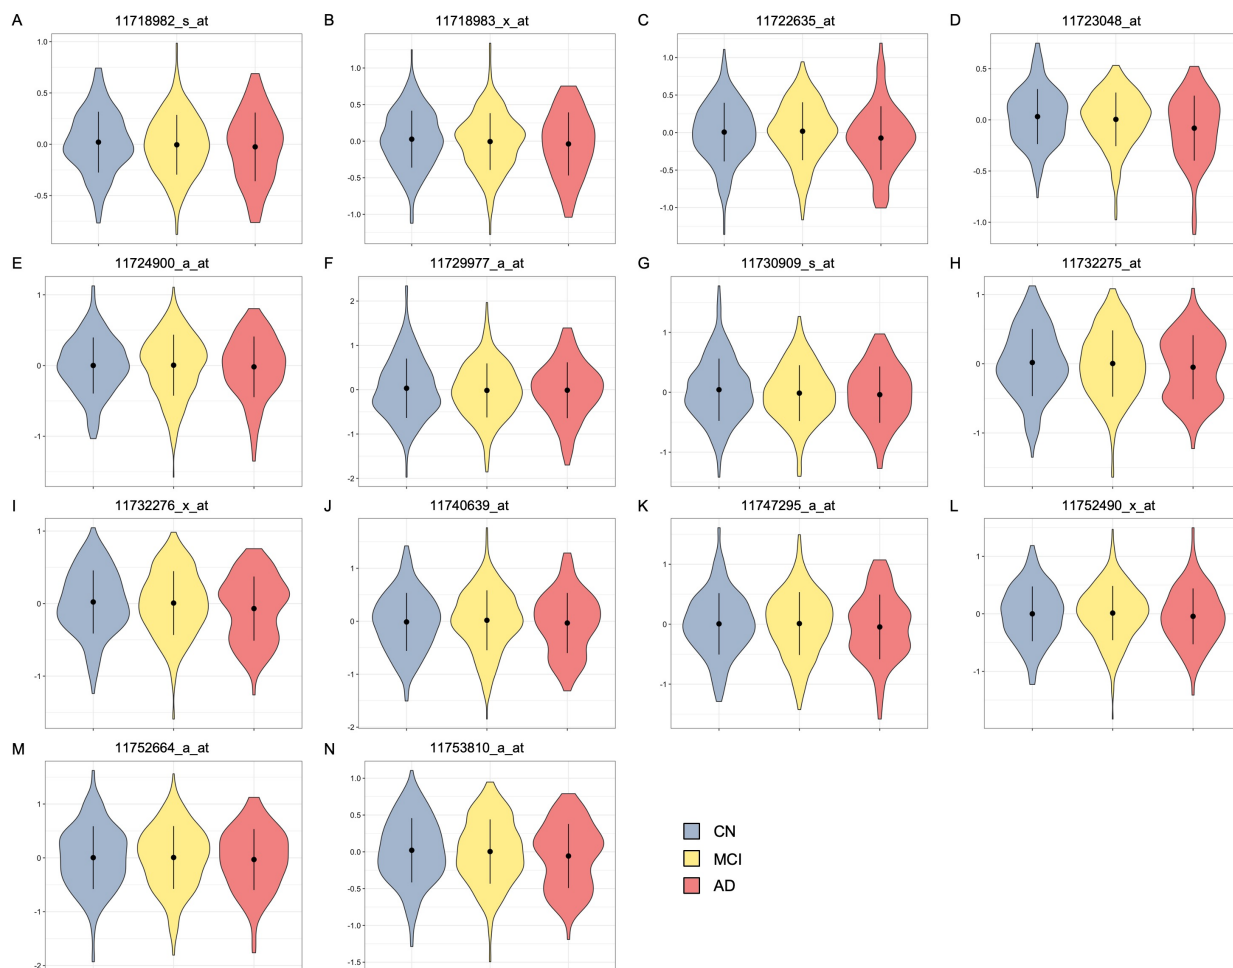

**Supplementary Fig.6 Expression levels of probes in 10 hub genes in each diagnostic group (CN: blue, MCI: yellow, AD: red). Gene expression levels of *CCL4* (A), *CCL4* (B), *IL2RB* (C) *CX3CR1* (D), *GZMB* (E), *CXCR6* (F), *CCR5* (G), *CCL5* (H), *CCL5* (I), *NMUR1* (J), *PRF1* (K), *NMUR1* (L), *SIPR5* (M), *CCL5* (N).**
